# Supplementary material for: Circulating low-molecular-weight (poly)phenol metabolites in the brain: unveiling in vitro and in vivo blood–brain barrier transport
Source: Royal Society of Chemistry journal article supplement (doi:10.1039/d4fo01396d), 2024-01-01
Supplement: d4fo01396d1.pdf [file d4fo01396d1.pdf]

**Circulating (poly)phenol metabolites in the brain: unveiling in vitro and in vivo blood-brain barrier transport**

Rafael Carecho<sup>1,2,\*</sup>, Daniela Marques<sup>1,\*</sup>, Diogo Carregosa<sup>1</sup>, Domenico Masuero<sup>3</sup>, Mar Garcia-Aloy<sup>3</sup>, Federica Tramer<sup>4</sup>, Sabina Passamonti<sup>4</sup>, Urska Vrhovsek<sup>3</sup>, Rita Ventura<sup>2</sup>, Maria Alexandra Brito<sup>5,6</sup>, Cláudia Nunes dos Santos<sup>1,2,7</sup>, Inês Figueira<sup>1,\$</sup>

<sup>1</sup> iNOVA4Health, NOVA Medical School, Faculdade de Ciências Médicas, Universidade NOVA de Lisboa, Campo dos Mártires da Pátria, Lisboa, Portugal.

<sup>2</sup> Instituto de Tecnologia Química e Biológica António Xavier, Universidade NOVA de Lisboa, Avenida da República, Oeiras, Portugal.

<sup>3</sup> Metabolomics Unit, Research and Innovation Centre, Fondazione Edmund Mach (FEM), via E. Mach 1, San Michele all'Adige, Italy.

<sup>4</sup> Department of Life Sciences, University of Trieste, via L. Giorgieri 1, Trieste, Italy.

<sup>5</sup> Research Institute for Medicines, Faculty of Pharmacy, Universidade de Lisboa, Av. Prof. Gama Pinto, Lisboa, Portugal.

<sup>6</sup> Department of Pharmaceutical Sciences and Medicines, Faculty of Pharmacy, Universidade de Lisboa, Av. Prof. Gama Pinto, Lisboa, Portugal.

<sup>7</sup> iBET, Instituto de Biologia Experimental e Tecnológica, Avenida da República, Apartado 12, Oeiras, Portugal.

## **SUPPLEMENTARY MATERIAL**

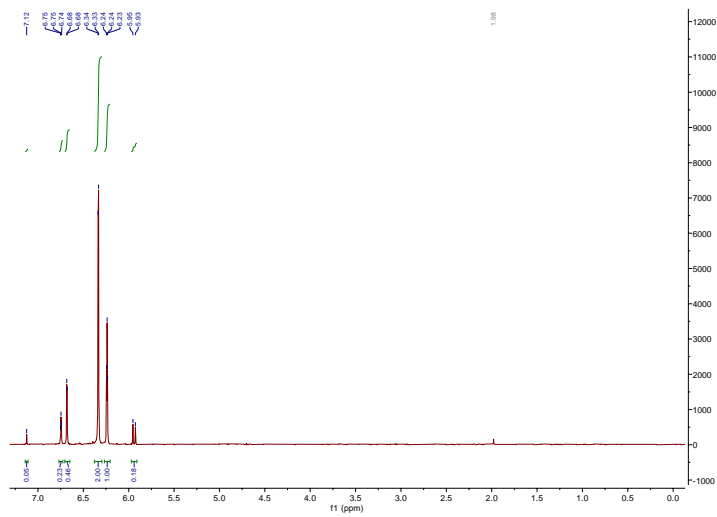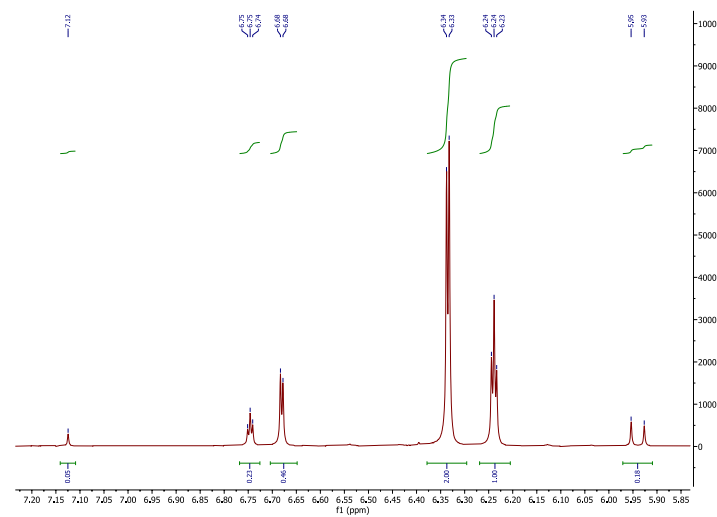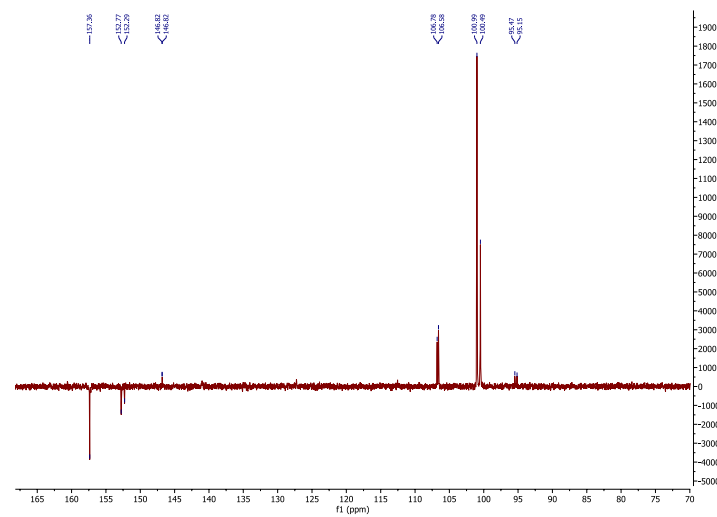

Fig. S1. 400MHz NMR spectra of phloroglucinol-*O*-sulfate (A) <sup>1</sup>H proton (B) <sup>13</sup>C carbon spectra

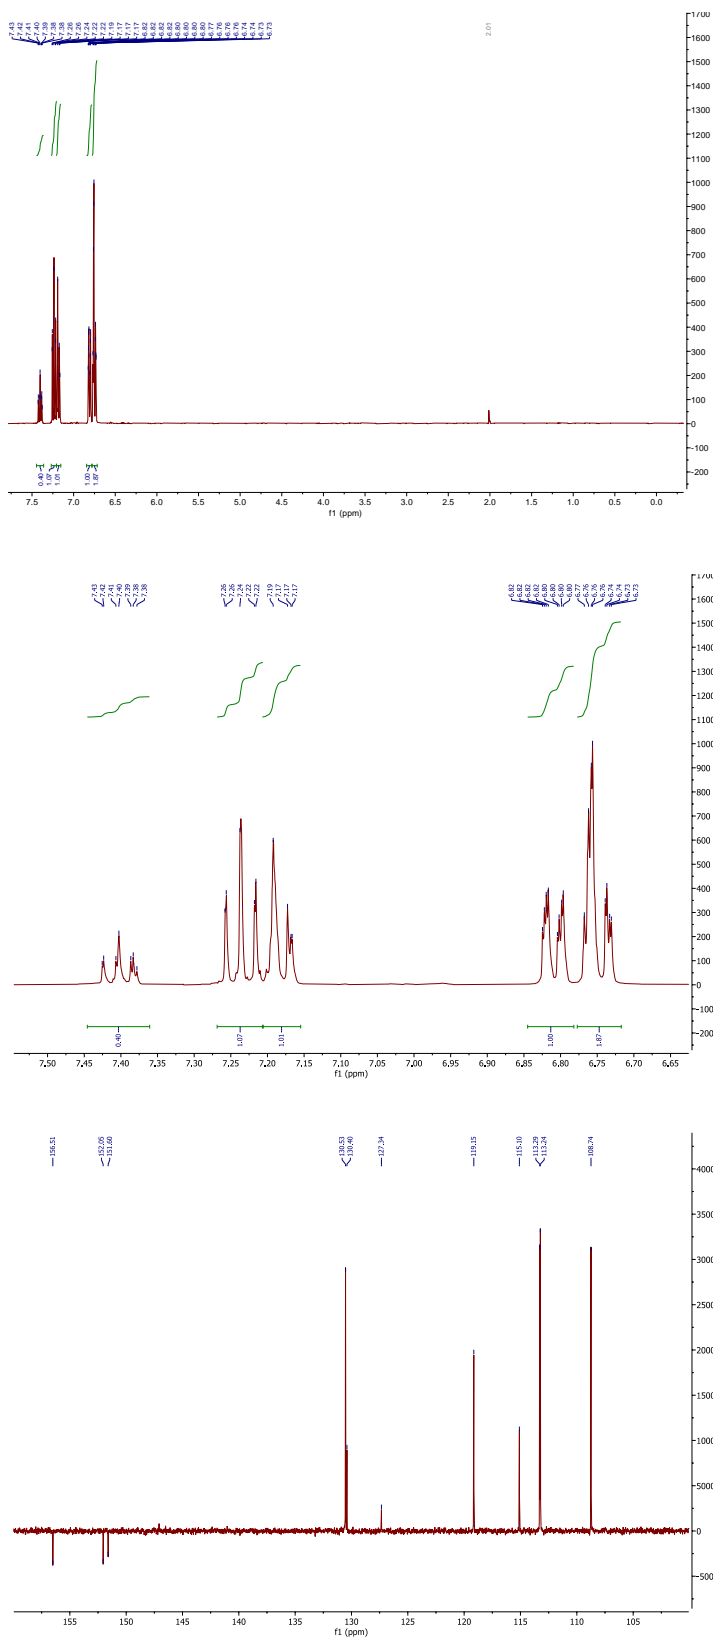

Fig. S2. 400MHz NMR spectra of resorcinol-sulfate (A)  $^1\text{H}$  proton (B)  $^{13}\text{C}$  carbon spectra

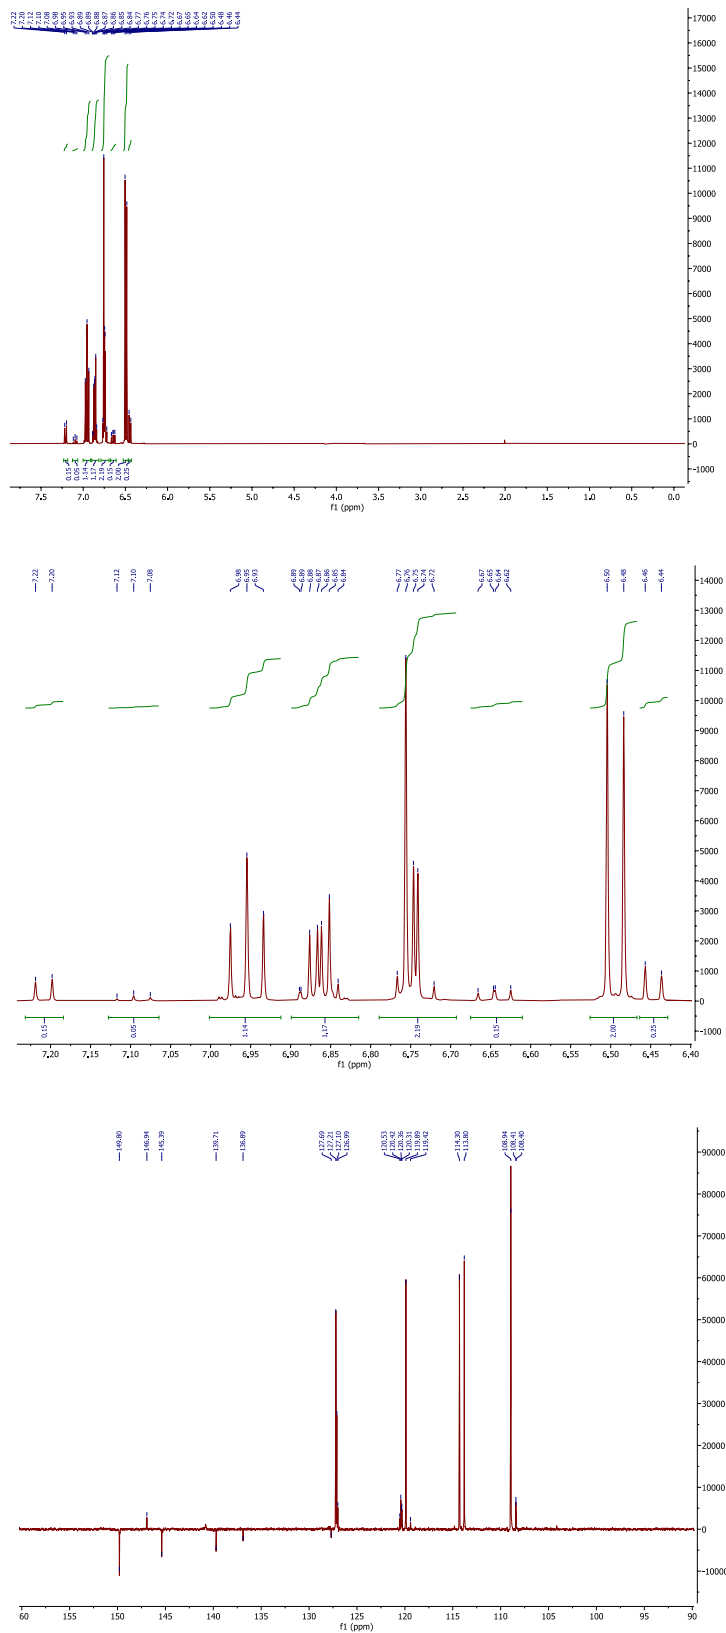

Fig. S3. 400MHz NMR spectra of pyrogallol-*O*-sulfate (A)  $^1\text{H}$  proton (B)  $^{13}\text{C}$  carbon spectra

A

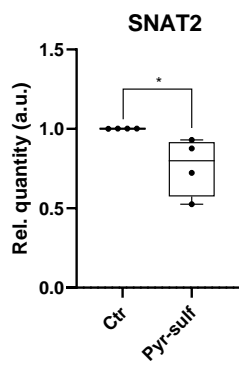

Fig. S4. HBMEC incubation with 5 $\mu$ M of Pyr-sulf for 2h significantly modulate the expression of *SNAT2* gene.

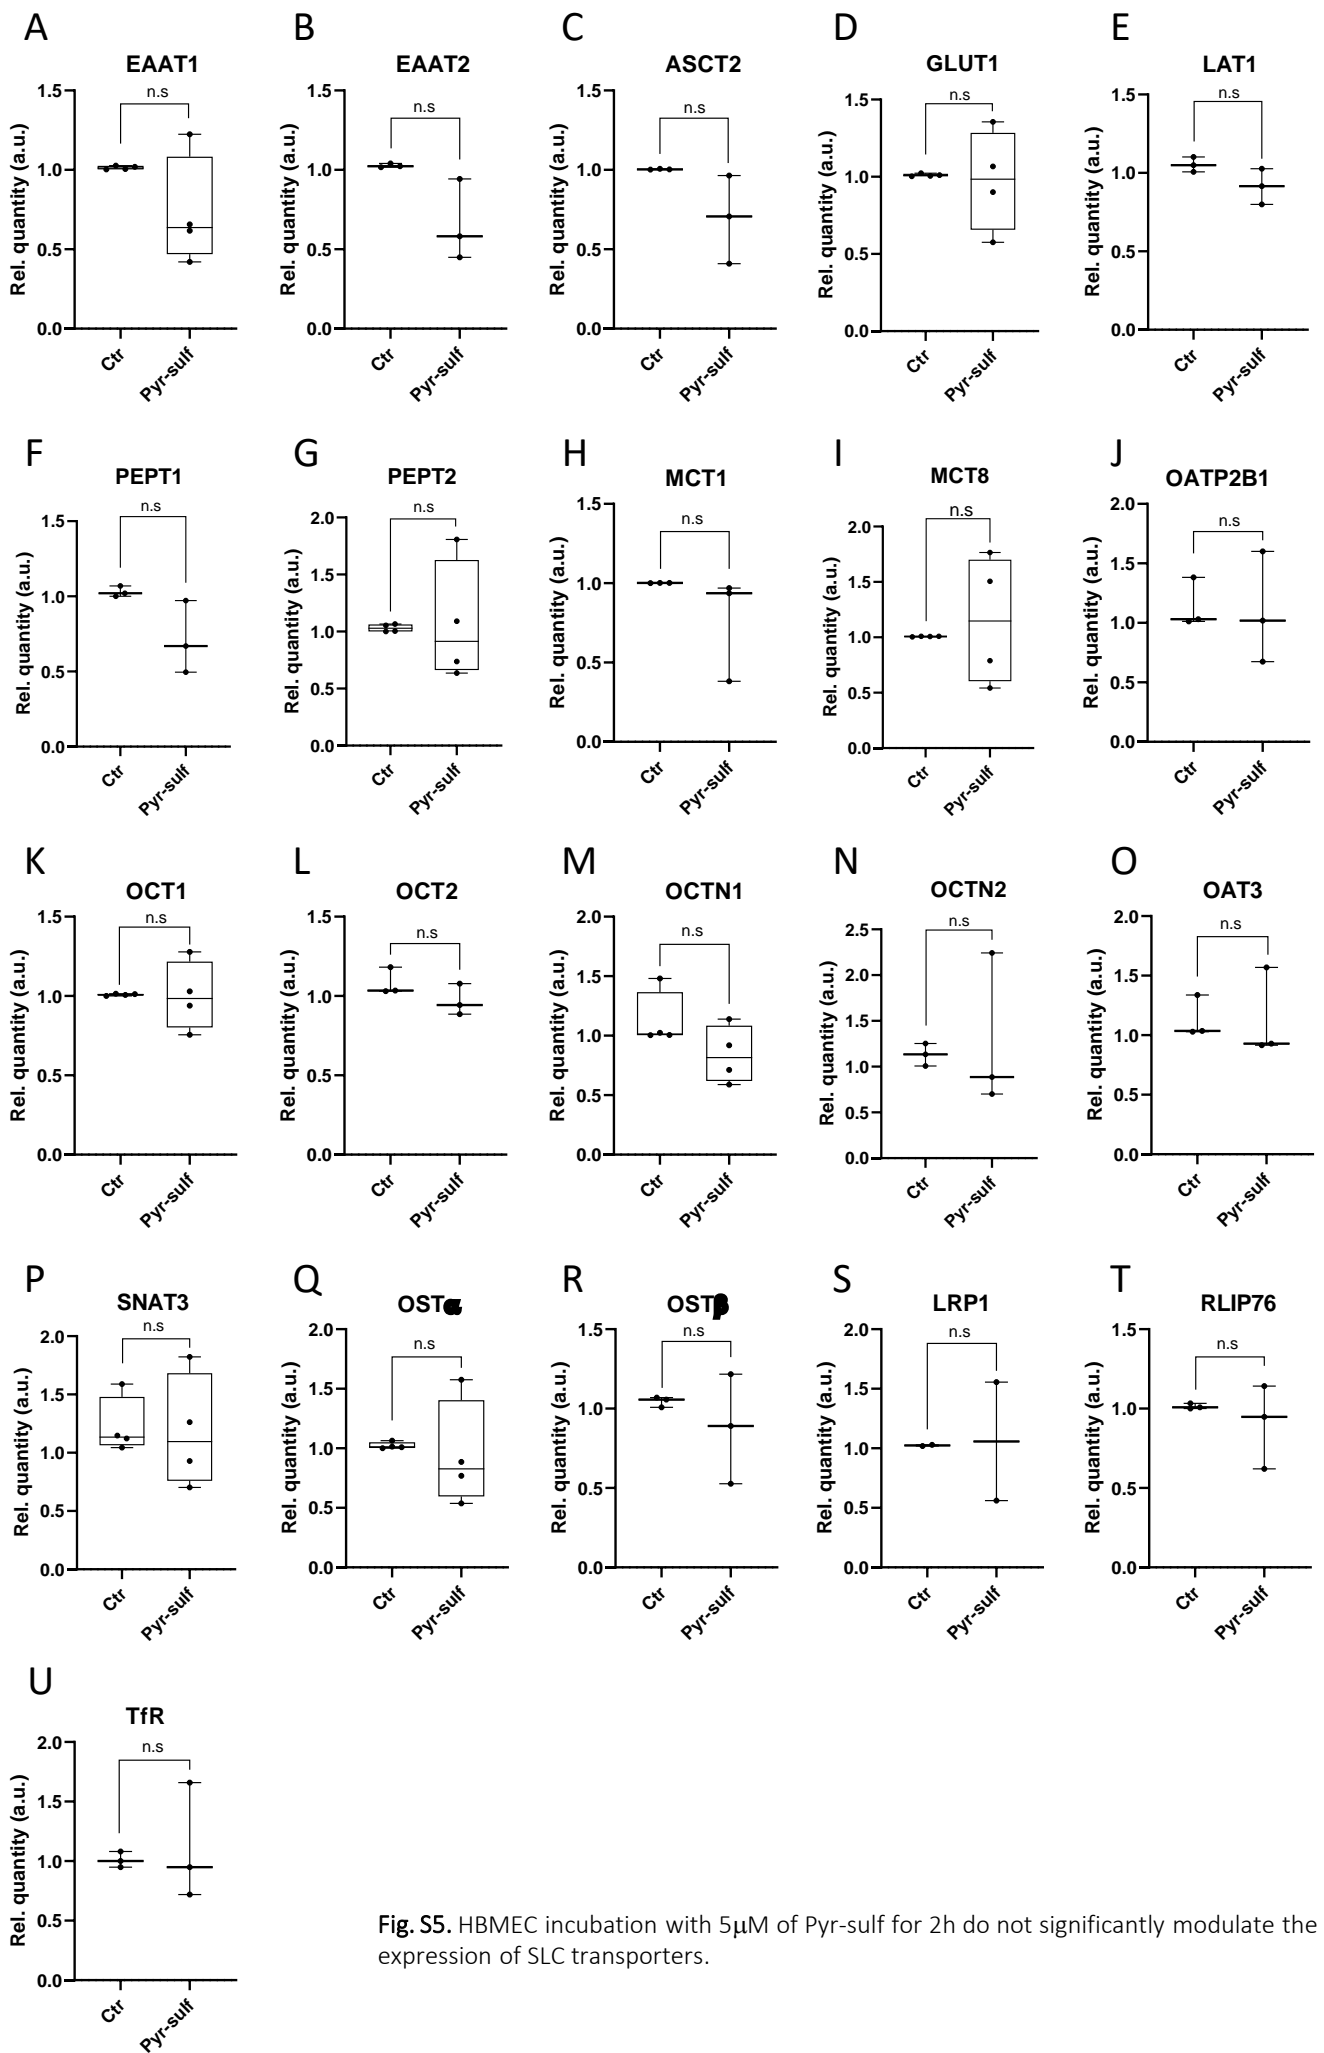

**Fig. S5.** HBMEC incubation with 5 $\mu$ M of Pyr-sulf for 2h do not significantly modulate the expression of SLC transporters.

**Table S1.** Primers list for RT-qPCR analysis of the different human transporters in HBMEC

| Gene (transporter)            | Forward (5'→3')         | Reverse (5'→3')          |
|-------------------------------|-------------------------|--------------------------|
| LRP1                          | TTGGATTGACGCCAGGTCAG    | CCAGTGTGTTTGTTCGCCAG     |
| RALPBP1 (RLIP76)              | GTAACAGGCAGAGGCTGGG     | AGGGACGAGGTCTTCTCTGT     |
| SLC1A2 (EAAT2)                | AGAGGGATCGCCTGCAAATC    | CAGAGAGTGGTGGCAGAGGA     |
| SLC1A3 (EAAT1)                | ATCCAGCAGGGAGTCCGTA     | CCAGATGCCCCAGAGAAACAA    |
| SLC1A4 (ASCT1)                | CTCTCCTCGCCTTTCTCGCA    | CTCTCCTCGCCTTTCTCGCA     |
| SLC1A5 (ASCT2)                | AGGCTTTCTCTGGCTGGTAAC   | TCTTAGGTCCGGGAGGGTG      |
| SLC2A1 (GLUT1)                | CACTGTCGTGTCGCTGTTTG    | AAAGATGGCCACGATGCTCA     |
| SLC7A1 (CAT1)                 | CCGCCGGCTTGGATTCTGA     | TTTGCACCCCATGTTGCTGT     |
| SLC7A5 (LAT1)                 | CCGAGGAGGCAGCCAAG       | TTGGACACATCACCCTTCCC     |
| SLC16A1 (MCT1)                | TGCGTGGGTACTGGAACAAG    | TGCAGGTCAAATCCAAATATCGTT |
| SLC16A2 (MCT8)                | CCTTCACCAGCTCCCTAAGC    | ATGGCTGAAAGGCGAAGGAA     |
| SLC22A1 (OCT1)                | AATGCTGAGCTGTACCCAC     | CCCAACACCGCAAACAAAATG    |
| SLC22A2 (OCT2)                | AATCTTACCCGCCTCCCTT     | CACAGAGCTCGTGAACCAGT     |
| SLC22A4 (OCTN1)               | CAACGCCTCAGCCTGTTTC     | CTACGGGTGATGACAGCGTT     |
| SLC22A5 (OCTN2)               | TGTCCACCATTGTGACCGAG    | GCAGGCTTCTTTCCCATCCT     |
| SLC22A8 (OAT3)                | TAGGACAGAGCAGGGACCTC    | GAGAAGGTCATGGCACTGGG     |
| SLC15A1 (PEPT1)               | CTGTGGCGAAGTGGTCTTCT    | GAATGTACTCGGCCACTGT      |
| SLC15A2 (PEPT2)               | GCCTTCAGCAGCCTCTGTTA    | ATGGCCAAGCACATACACCA     |
| SLC38A2 (SNAT2)               | CTCCTACCCACCAAGCAAG     | CCCACAATCGCATTGCTCAG     |
| SLC38A3 (SNAT3)               | AACCGCGAGGCCAGACATC     | AGCAGCCCCTCTGAGTGTTC     |
| SLC51A (OST $\alpha$ )        | TAAAGCTTGACCCAGGTACA    | ATGCTAGTGAGGGCAAGTTCC    |
| SLC51B (OST $\beta$ )         | AGCATCCAGGCAAGCAGAAAA   | GTGATCCTTGGCCTCATCCA     |
| SLCO1A2 (OATP1A2)             | AGCGTTCAGGTATTTTTGTAATG | TCCCATGTTGCTTTCAGGG      |
| SLCO2B1 (OATP2B1)             | CTGGAGCTCCACCGTTATT     | CTCACCCGCTGGCCCTATC      |
| TfR                           | TCGTGTCCTCCCTCATCCT     | ACACAGAAGAACCTGCAGCC     |
| $\beta$ 2-microglobulin (B2M) | GGCTATCCAGCGTACTCCAA    | ACCAGTCCTTGCTGAAAGACAA   |
| $\beta$ -Actin                | AACTACCTCAACTCCATCA     | GAGCAATGATCTTGATCTTCA    |
